# Supplementary material for: A Cylindrical Molding Method for the Biofabrication of Plane-Shaped Skeletal Muscle Tissue
Source: MDPI journal article supplement (doi:10.3390/mi12111411), 2021-11-17
Supplement: s1 [file s1]

## Supplementary Materials for

A cylindrical molding method for the biofabrication of wide-area skeletal muscle tissue with minimized material loss

Minghao Nie, Ai Shima, Kenta Fukushima, Yuya Morimoto, and Shoji Takeuchi

correspondence to: [takeuchi@hybrid.t.u-tokyo.ac.jp](mailto:takeuchi@hybrid.t.u-tokyo.ac.jp)

### **This PDF file includes:**

Figure S1

Figure S2

### **Other Supplementary Materials for this manuscript includes the following:**

Movie S1

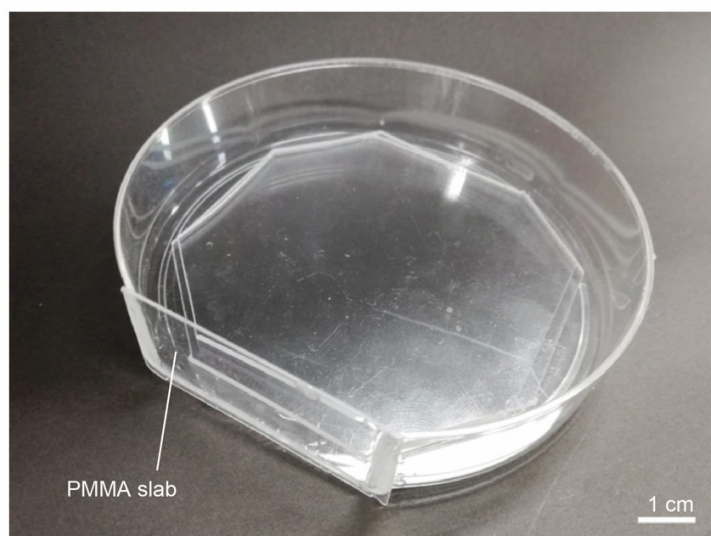

**Figure S1.**

Photo image of the modified petri dish for measuring the thickness of the tissue. Scale bar: 1 cm.

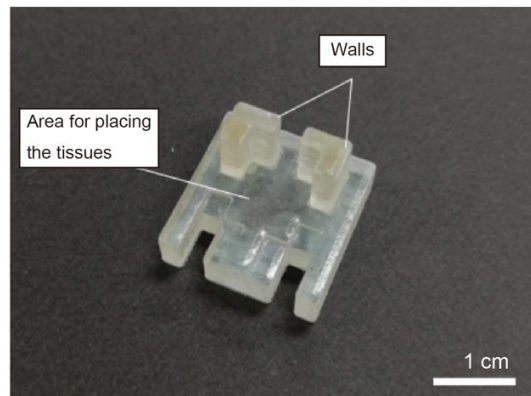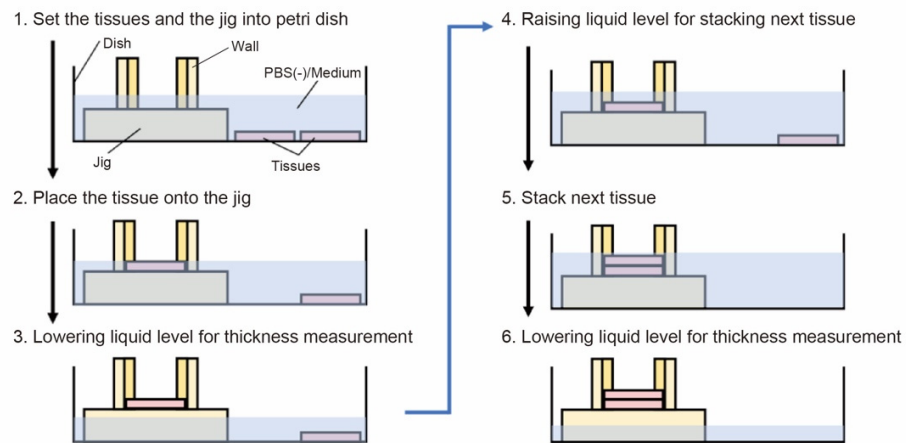

**Figure S2.**

The jig used for the stacking of the cm-order tissue block. Upper: photo image of the jig. Lower: illustrations depicting the steps for the stacking and thickness measurement of the tissues using the stacking of two tissue layers as an example. Scale bar: 1 cm.

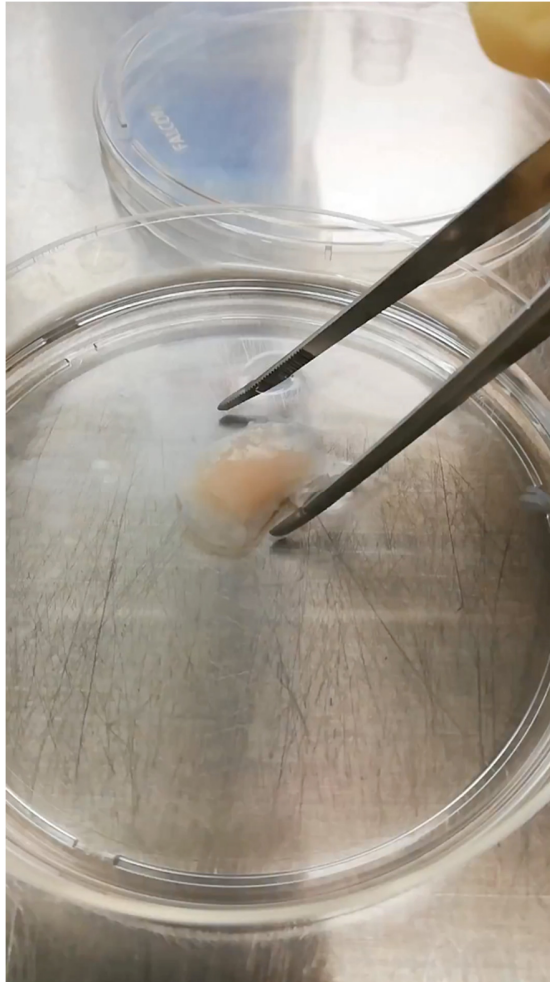

**Movie S1**

A video showing the handling of the cm-order tissue block using a tweezer.
